# Supplementary material
Source: PubMed Central journal article supplement (PMC6823857)
Supplement: 153496_0_supp_351367_ptfjl4.pdf [file 153496_0_supp_351367_ptfjl4.pdf]

Supplemental Materials for

Deep protein methylation profiling by combined chemical and immunoaffinity approaches reveals novel PRMT1 targets

Nicolas G. Hartel<sup>1</sup>, Brandon Chew<sup>1</sup>, Jian Qin<sup>2,3,4</sup>, Jian Xu<sup>2,3,4</sup>, Nicholas A. Graham<sup>1,4\*</sup>

<sup>1</sup>Mork Family Department of Chemical Engineering and Materials Science; <sup>2</sup>Center for Craniofacial Molecular Biology; <sup>3</sup>Herman Ostrow School of Dentistry; <sup>4</sup>Norris Comprehensive Cancer Center, University of Southern California, Los Angeles, CA 90089

\*To whom correspondence should be addressed: Nicholas A. Graham, University of Southern California, 3710 McClintock Ave., RTH 509, Los Angeles, CA 90089. Phone: 213-240-0449; E-mail: nagraham@usc.edu

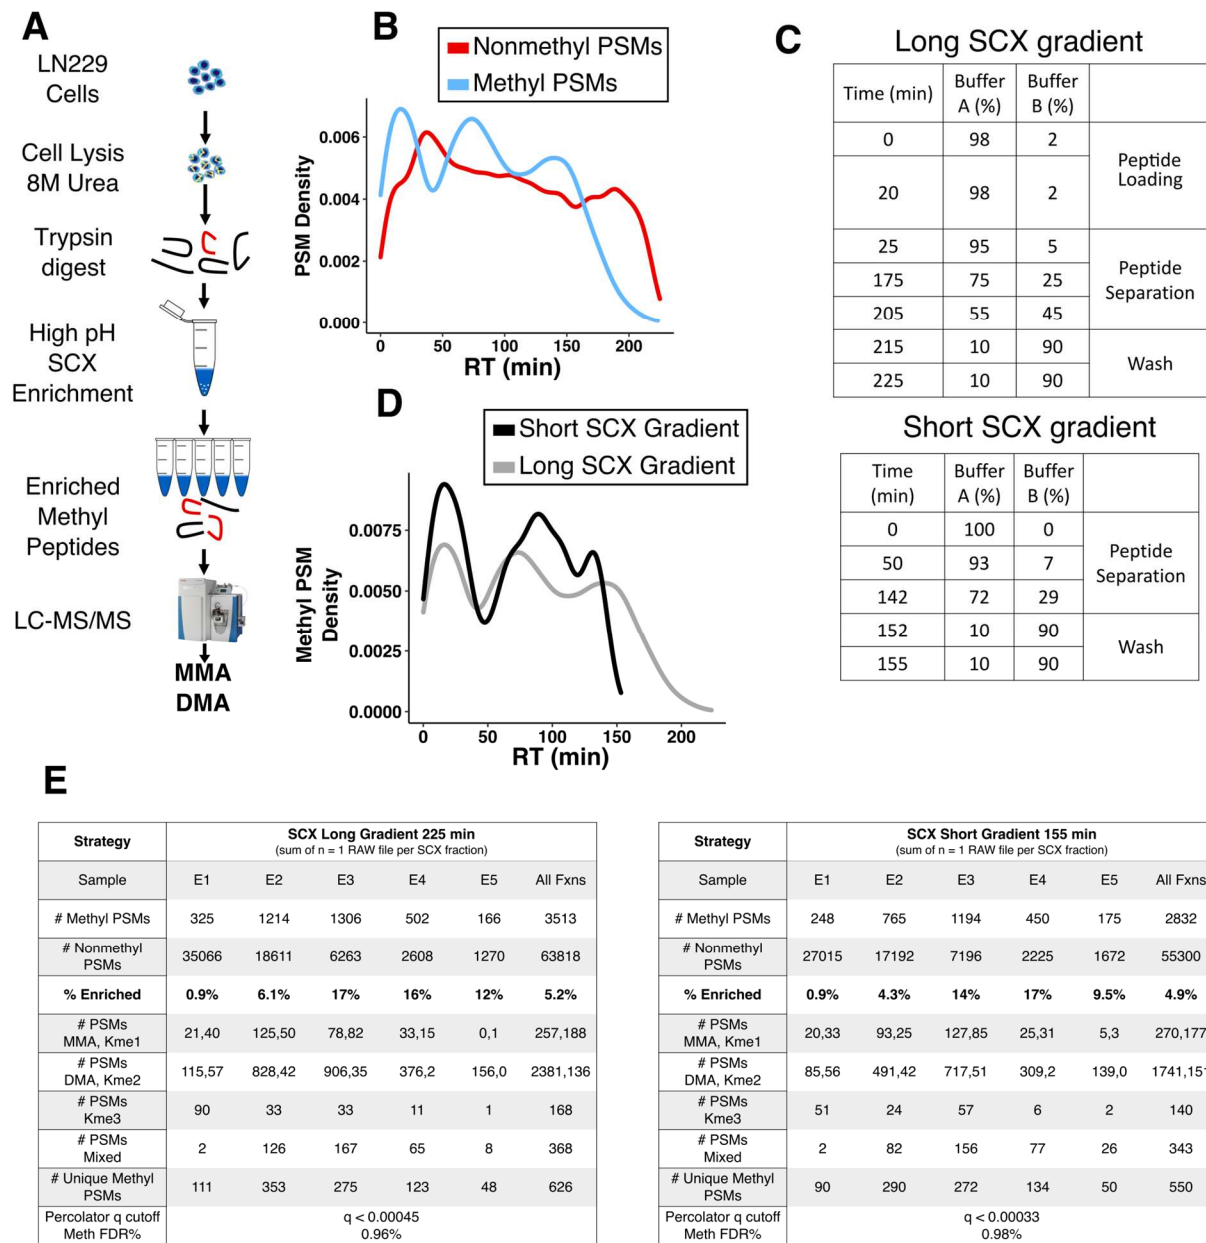

**Fig. S1. Gradient improvement for high pH SCX enrichment.**

A) Workflow of high pH SCX enrichment (1). LN229 cells were lysed in 8M urea and digested with trypsin. From 1 mg of protein, five fractions are produced by the SCX procedure and were subsequently run on a Q Exactive Plus MS. The data was searched on Proteome Discoverer 2.2 and methyl peptides were subject to a strict 1% methyl FDR. The number of PSMs for two gradients tested is shown in the table in E).

B) Density plots of PSM retention times for methyl and nonmethyl PSMs run on the “Long” SCX gradient used from Wang *et al.*. PSMs from all 5 fractions were combined and their retention times plotted. The average density of nonmethyl PSMs and methyl PSMs was 275 PSM / min and 15 PSMs / min, respectively.

C) Original “Long” gradient and a new proposed “Short” gradient for SCX. Wang *et al.* did not collect spectra for the first 20 min during sample loading, but because we found that methyl PSMs were eluting during this sample loading phase, we did collect spectra during this phase of the LC gradient.

D) Density plot of methyl PSM retention time for methyl PSMs captured by the “Long” and “Short” SCX gradients. PSMs from all 5 fractions were combined and their retention times plotted for each gradient. The average density of “Long” and “Short” gradient methyl PSMs was 15 PSM / min and 19 PSMs / min, respectively.

E) Summary of spectra identified by each gradient. Each of the five SCX fractions are shown individually. The numbers of methyl and nonmethyl PSMs were used to calculate the percent enrichment for each fraction. The number of MMA, Kme1, DMA, Kme2, PSMs, and mixed methyl PSMs are shown. Mixed PSMs contained a mixture of methyl marks on the same peptide (e.g., MMA and DMA). The percolator q-value cutoff used to estimate the methyl FDR is also shown for each technique.

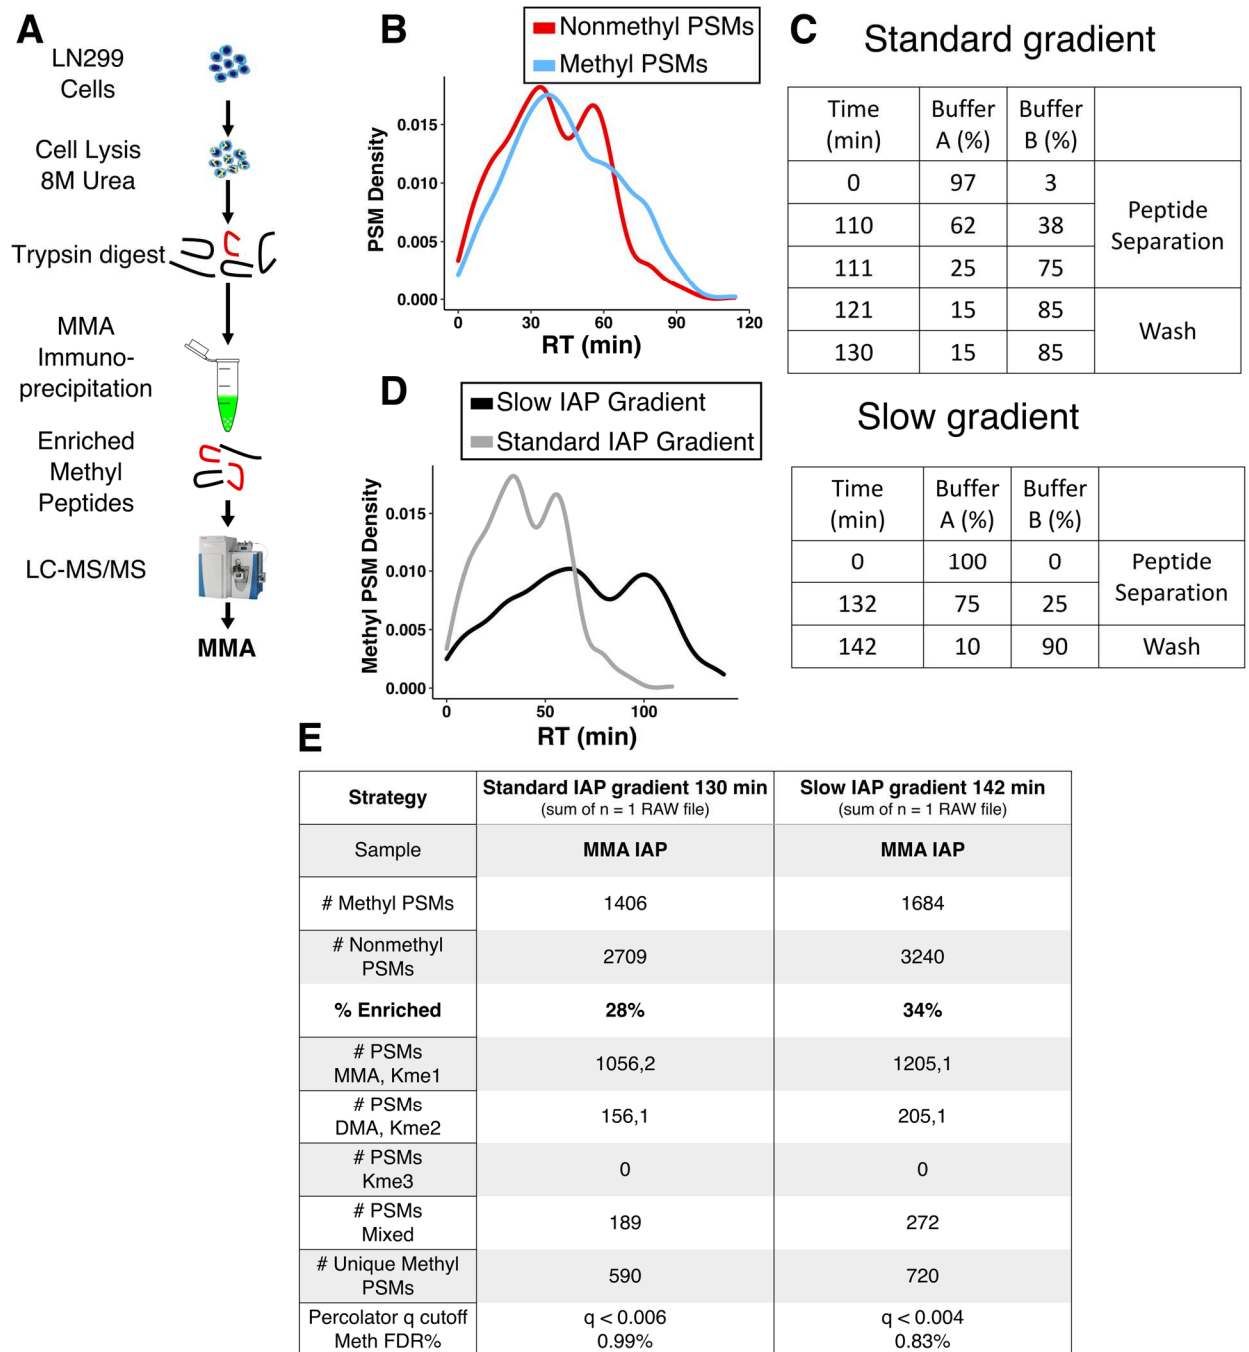

**Fig. S2. Gradient improvement for MMA IAP enrichment.**

A) Workflow of MMA IAP enrichment. LN229 cells were lysed in 8M urea and digested with trypsin.

10 mg of protein were incubated with commercial anti-MMA antibodies conjugated to agarose beads, washed, and eluted, and subsequently run on a Q Exactive Plus MS. The data was

searched on Proteome Discoverer 2.2 and methyl peptides were subject to a strict 1% methyl FDR. The number of PSMs for two gradients tested is shown in the table in E).

B) Density plots of PSM retention times for methyl and nonmethyl PSMs run on an in-house “Standard” gradient, similar to other IAP methods (2). The average density of nonmethyl and methyl PSMs was 22 PSM / min and 12 PSMs / min, respectively.

C) In-house “Standard” proteomics gradient and a new proposed “Slow” gradient for MMA IAP. The “Slow” gradient extends the length of the gradient slightly but uses a slower ramp of acetonitrile.

D) Density plot of methyl PSM retention time for methyl PSMs captured by the “Standard” and “Slow” IAP LC gradients. The average density of methyl PSMs for the “Standard” and “Short” LC gradients was 12 PSM / min and 13 PSMs / min, respectively.

E) Summary of spectra identified by each gradient. The numbers of methyl and nonmethyl PSMs were used to calculate the percent enrichment for each fraction and IAP. The number of MMA, Kme1, DMA, Kme2, Kme3, and mixed PSMs are shown. Mixed PSMs contained a mixture of methyl marks on the same peptide (e.g., MMA and DMA). The percolator q-value cutoff used to estimate the methyl FDR is also shown for each technique.

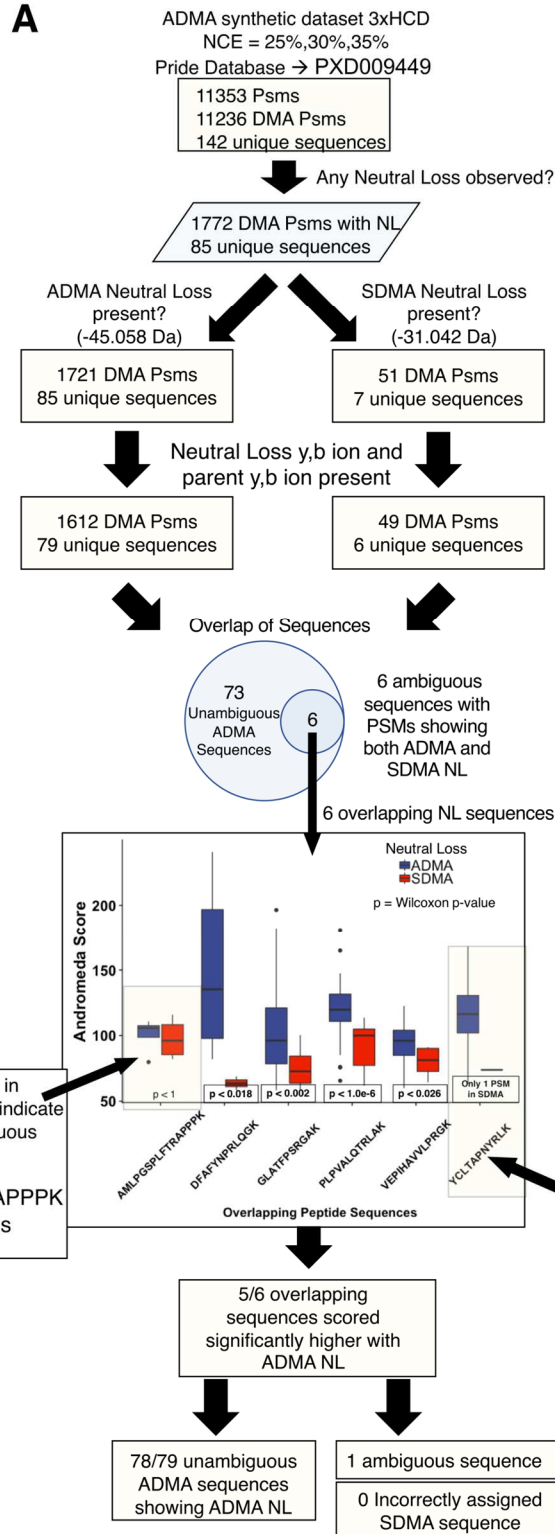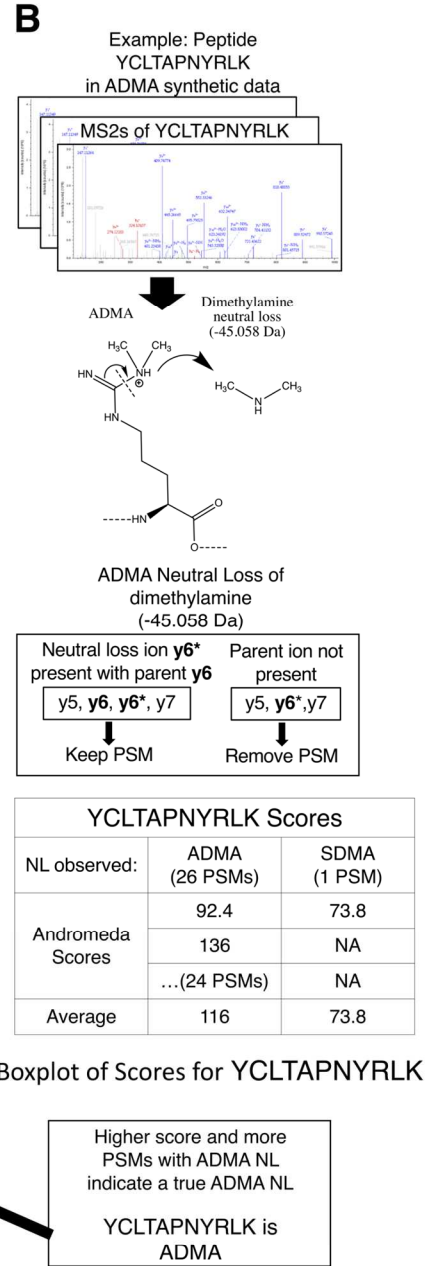

### **Fig. S3. Andromeda identifies ADMA through neutral loss of dimethylamine**

A) Workflow diagram of the steps used to validate Andromeda searches for the neutral loss of dimethylamine in a synthetic ADMA dataset (3) (PXD009449). Roughly 140 synthetic peptides contained a single, non-terminal dimethyl ADMA. Starting from the Andromeda output `msms.txt`, peptides that exhibited neutral loss were annotated with either ADMA (dimethylamine) and/or SDMA neutral loss (methylamine) (4–6). We then required that each neutral loss ion be accompanied by the original b/y ion (e.g.,  $y6^*$  was kept if and only if  $y6$  was also present). Our rationale for this filter was that neutral loss ions are typically weaker than the original b/y ion, so neutral loss ions not accompanied by the original b/y ion are likely to be false positive identifications. After this filtering, 73 peptides showed ADMA neutral loss and 6 peptides showed evidence of both ADMA and SDMA neutral losses. For the 6 ambiguous peptides, the mean Andromeda Score of the PSMs was calculated for all ADMA and SDMA PSMs. The boxplot in A) shows that for 6 of 7 synthetic methylated peptides their mean Andromeda Scores allowed clear assignment of ADMA. Only one ambiguous peptide which had similar Andromeda scores for ADMA and SDMA neutral loss PSMs could not be assigned. An identical process was used to process the synthetic SDMA dataset which also contained roughly 140 peptides. As a control, the unmodified synthetic dataset was also searched on Andromeda and no methylamine/dimethylamine neutral losses were detected (data not shown). For our own data, because MMA can also produce a neutral loss of methylamine, we imposed an additional restriction for mixed peptides containing both MMA and SDMA that that the SDMA site be localizable by the neutral loss ions. If the SDMA site could not be localized by neutral loss ions, the neutral loss was rejected. All reported neutral loss masses are charge +1.

B) Example calculation for one synthetic ADMA peptide, YCLTAPNYRLK. MS2 spectra of YCLTAPNYRLK were searched for ADMA and/or SDMA neutral losses. Spectra that contained neutral losses were subjected to the requirement that a neutral loss/original y ion pair must be present for the neutral loss to be considered. YCLTAPNYRLK had 26 PSMs with ADMA neutral

losses and only 1 PSMs with SDMA neutral losses. The ADMA PSMs had an average Andromeda score of 116, whereas the SDMA PSM had a score of 73.8. Because ADMA PSMs were substantially more numerous (26 to 1) and the ADMA Andromeda scores were much higher than the SDMA Andromeda score suggested that YCLTAPNYRLK is ADMA modified. All reported neutral loss masses are charge +1.



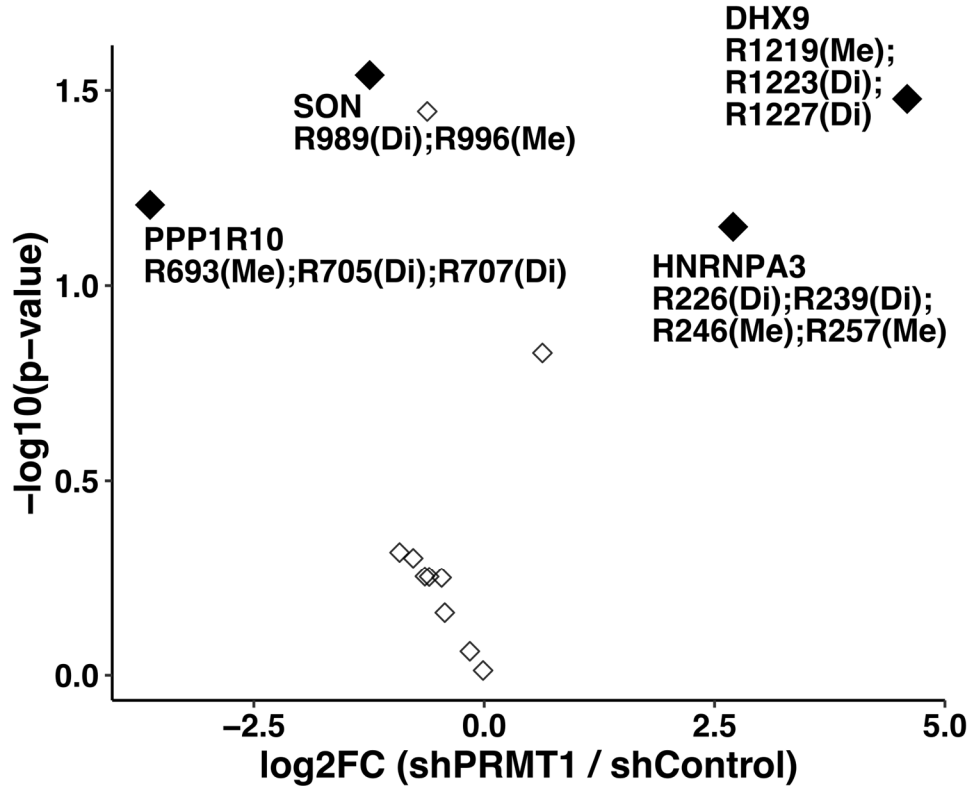

**Fig. S4. Quantification of mixed methyl arginine SCX peptides**

A) Volcano plot of quantified mixed methyl arginine peptides identified by SCX from 293T cells expressing shControl or shPRMT1. Mixed peptides contained both an MMA site and a DMA site on the same peptide. LFQ values were log<sub>2</sub> transformed, median normalized, and subjected to a permutation t-test in Perseus with  $q < 0.05$ , and  $S_0 = 0.5$ . Filled diamonds represent peptides that have a q-value  $< 0.05$ .

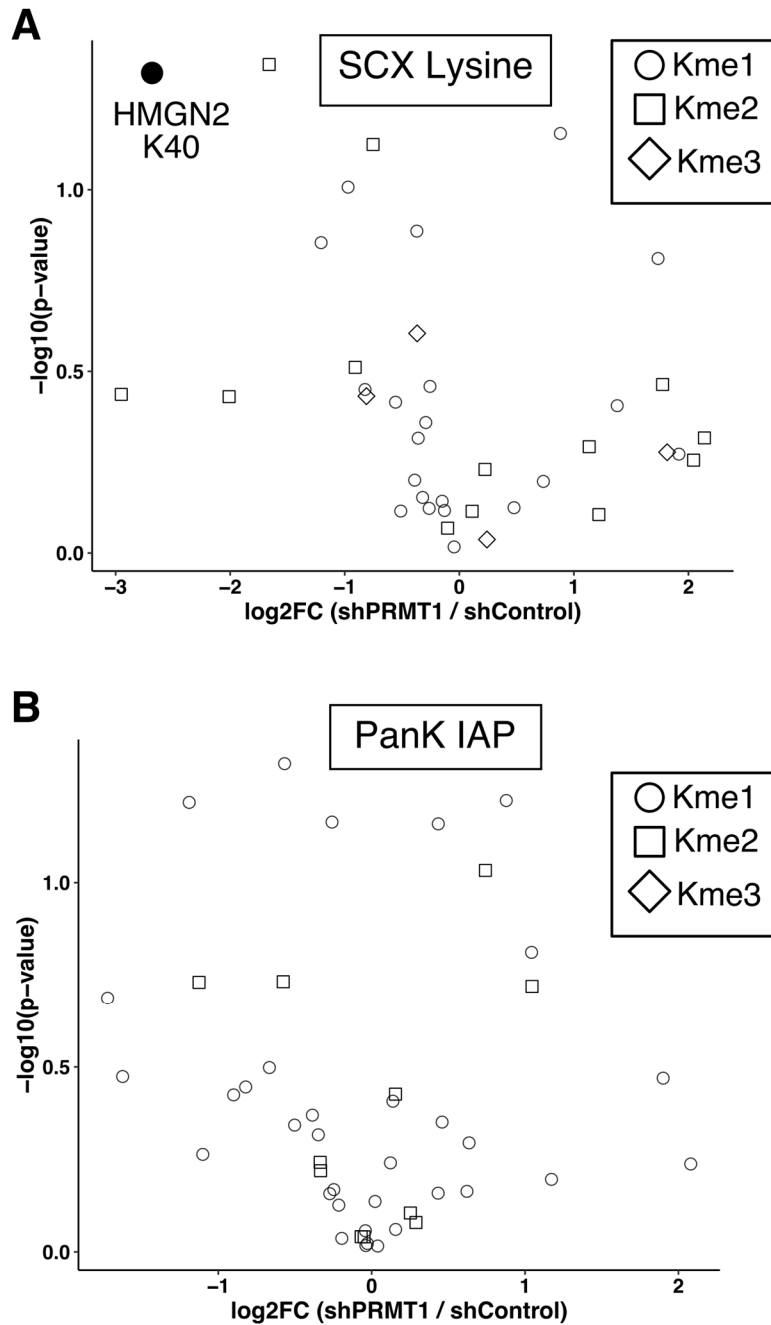

**Fig. S5. Lysine methylation is minimally affected by knockdown of PRMT1.**

A) Volcano plot of quantified methyl lysine peptides enriched by SCX on 293T cells expressing shControl and shPRMT1. LFQ values were  $\log_2$  transformed, median normalized, and subjected to a Perseus permutation-based t-test to assess significance with parameters  $q < 0.05$  and  $S_0 =$

0.5. Filled symbols represent a q-value < 0.05. Only one site, HMG2 K40, was found to significantly change upon PRMT1 knockdown.

B) Similar to A) but for PanK IAP enriched methyl lysine peptides. No significant changes were observed for PanK IAP upon knockdown of PRMT1.

| Methyl Site      | Peptide Sequence and Neutral Loss Assignment                                                         | DMA log <sub>2</sub> FC SCX | Q-value |
|------------------|------------------------------------------------------------------------------------------------------|-----------------------------|---------|
| G3BP1 R447; R460 | GPPRGGMVQKPGFGVGRGLAPR<br>DMA (on R447), SDMA (on R460)                                              | -1.27                       | 0.14    |
| G3BP1 R460       | GGMVQKPGFGVGRGLAPR<br>SDMA (on R460)                                                                 | 3.05                        | 0.38    |
| FUS R216; R218   | GGRGRGGSGGGGGGGGYNR<br>SDMA (on R216), DMA (on R218)                                                 | -1.10                       | 0.18    |
| FUS R218         | GRGGSGGGGGGGGYNR<br>DMA (on R218)                                                                    | 3.89                        | 0.12    |
| CNBP R32         | SRGRGFQFVSSSLPDICYR<br>DMA (on R32)                                                                  | 1.26                        | 0.37    |
| CNBP R32; R34    | SRGRGFQFVSSSLPDICYR<br>DMA (on R32), DMA (on R34)<br>There was an unlocalized SDMA neutral loss here | -1.89                       | 0.13    |
| CNBP R34         | GRGFQFVSSSLPDICYR<br>DMA (on R34)                                                                    | 0.84                        | 0.37    |

**Fig. S6. Missed cleavage patterns of quantified methyl peptides demonstrate methylation changes upon PRMT1 knockdown.**

Quantified SCX peptides with missed cleavage variants from 293T cells expressing either shPRMT1 or shControl are displayed, along with log<sub>2</sub> fold change of shPRMT1/shControl, permutation t-test q-values, and neutral losses if present. Examination of missed cleavage peptides improved confidence in methylation changes upon PRMT1 knockdown. (top) The missed cleavage peptide G3BP1 R447(DMA);R460(SDMA) was downregulated in PRMT1 knockdown cells, but the fully tryptic peptide G3BP1 R460(SDMA) was upregulated in PRMT1 knockdown

cells. This suggests that R447 was demethylated in PRMT1 knockdown cells, leading to cleavage at R447 and therefore increased abundance of the G3BP1 R460(SDMA) peptide. We did not observe neutral losses to assign R447 as either ADMA or SDMA modified. (middle) The missed cleavage peptide FUS R216(SDMA);R218(DMA) was downregulated in PRMT1 knockdown cells, but the fully cleaved peptide FUS R218(DMA) was upregulated in PRMT1 knockdown cells. This suggests that FUS R216(SDMA) was demethylated in PRMT1 knockdown cells, leading to cleavage at R216 and therefore increased abundance of tryptic peptide FUS R218. (bottom) The missed cleavage peptide CNBP R32(DMA);R34(DMA) was downregulated in PRMT1 knockdown cells, but both the fully cleaved peptide CNBP R34(DMA) and the missed cleavage peptide CNBP R32(DMA) were upregulated in PRMT1 knockdown cells. This suggests that CNBP exists in doubly dimethylated form in shControl cells but in either of two singly dimethylated forms in shPRMT1 cells.

## Supplemental References

1. Wang, K., Dong, M., Mao, J., Wang, Y., Jin, Y., Ye, M., and Zou, H. (2016) Antibody-Free Approach for the Global Analysis of Protein Methylation. *Anal. Chem.* **88**, 11319–11327
2. Guo, A., Gu, H., Zhou, J., Mulhern, D., Wang, Y., Lee, K. A., Yang, V., Aguiar, M., Kornhauser, J., Jia, X., Ren, J., Beausoleil, S. A., Silva, J. C., Vemulapalli, V., Bedford, M. T., and Comb, M. J. (2014) Immunoaffinity Enrichment and Mass Spectrometry Analysis of Protein Methylation. *Mol. Cell. Proteomics.* **13**, 372–387
3. Zolg, D. P., Wilhelm, M., Schmidt, T., Medard, G., Zerweck, J., Knaute, T., Wenschuh, H., Reimer, U., Schnatbaum, K., and Kuster, B. (2018) ProteomeTools: Systematic characterization of 21 post-translational protein modifications by LC-MS/MS using synthetic peptides. *Mol. Cell. Proteomics.* 10.1074/mcp.TIR118.000783
4. Musiani, D., Bok, J., Massignani, E., Wu, L., Tabaglio, T., Ippolito, M. R., Cuomo, A., Ozbek, U., Zorgati, H., Ghoshdastider, U., Robinson, R. C., Guccione, E., and Bonaldi, T. (2019) Proteomics profiling of arginine methylation defines PRMT5 substrate specificity. *Sci Signal.* **12**, eaat8388
5. Brame, C. J., Moran, M. F., and McBroom-Cerajewski, L. D. B. (2004) A mass spectrometry based method for distinguishing between symmetrically and asymmetrically dimethylated arginine residues. *Rapid Commun. Mass Spectrom.* **18**, 877–881
6. Nability, M. B., Lees, G. E., Boggess, M. M., Yerramilli, M., Obare, E., Yerramilli, M., Rakitin, A., Aguiar, J., and Relford, R. (2015) Symmetric Dimethylarginine Assay Validation, Stability, and Evaluation as a Marker for the Early Detection of Chronic Kidney Disease in Dogs. *J. Vet. Intern. Med.* **29**, 1036–1044
